# Supplementary material for: Joint Decision-Making Model Based on Consensus Modeling Technology for the Prediction of Drug-Induced Liver Injury
Source: Hindawi journal article supplement (doi:10.1155/2021/2293871), 2021-12-27
Supplement: f1 [file 2293871.f1.zip]

Archive with 3 entries (3 files):
- 2293871.f1/DILI_DataSet.doc
- 2293871.f1/External _validation_Set.doc
- 2293871.f1/Supplementary.pdf
