# Supplementary material for: Joint Decision-Making Model Based on Consensus Modeling Technology for the Prediction of Drug-Induced Liver Injury
Source: Hindawi journal article supplement (doi:10.1155/2021/2293871), 2021-12-27
Supplement: f1 [file 2293871.f1.zip › 2293871.f1/Supplementary.pdf]

## **Supplementary Materials**

### **Joint Decision-Making Model Based on Consensus Modeling technology for the Prediction of Drug-induced Liver Injury**

<sup>a,b</sup>Yukun Wang and <sup>b\*</sup>Xuebo Chen

<sup>a</sup> School of Chemical Engineering, University of Science and Technology Liaoning, No. 185, Qianshan, Anshan 114051, Liaoning, China; wyk410@163.com

<sup>b</sup> School of Electronic and Information Engineering, University of Science and Technology Liaoning, No. 185, Qianshan, Anshan 114051, Liaoning, China

\* Correspondence: xuebochen@126.com; Tel.: +864125928367

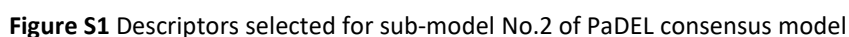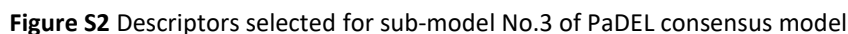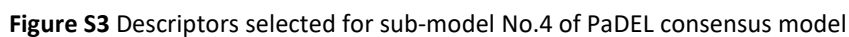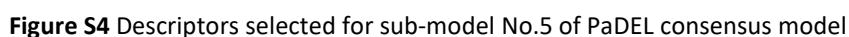

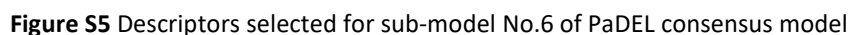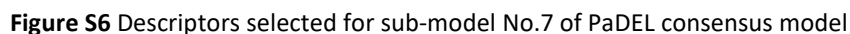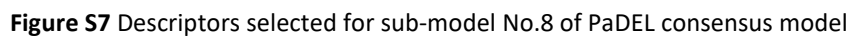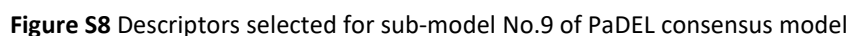

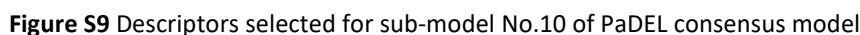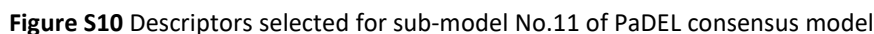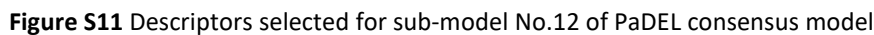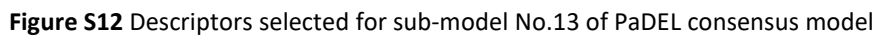

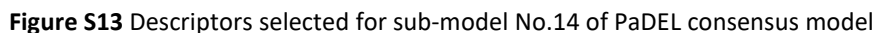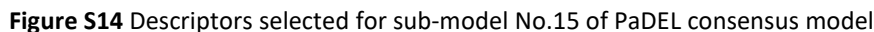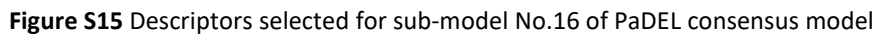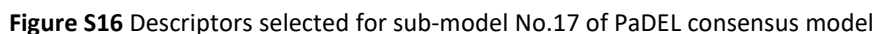

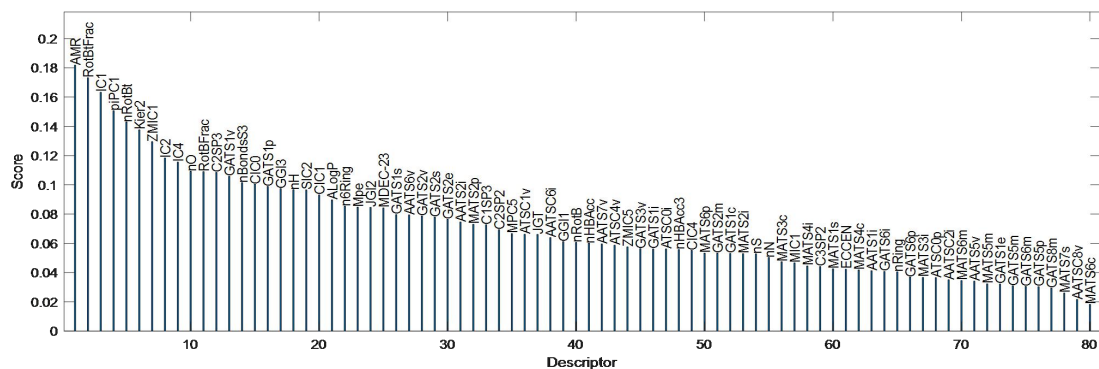

**Figure S17** Descriptors selected for sub-model No.18 of PaDEL consensus model

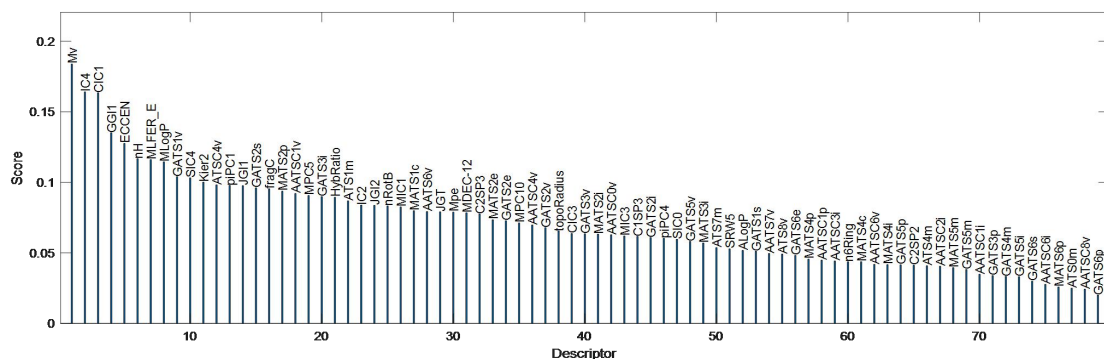

**Figure S18** Descriptors selected for sub-model No.19 of PaDEL consensus model

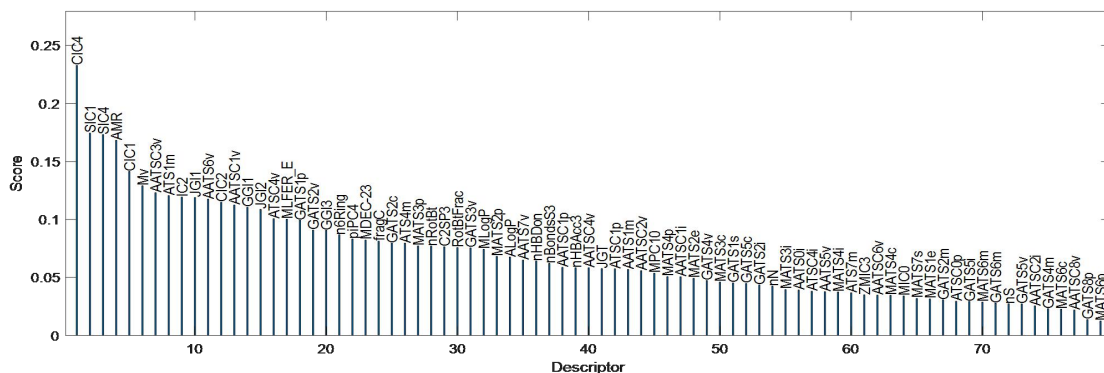

**Figure 19** Descriptors selected for sub-model No.20 of PaDEL consensus model

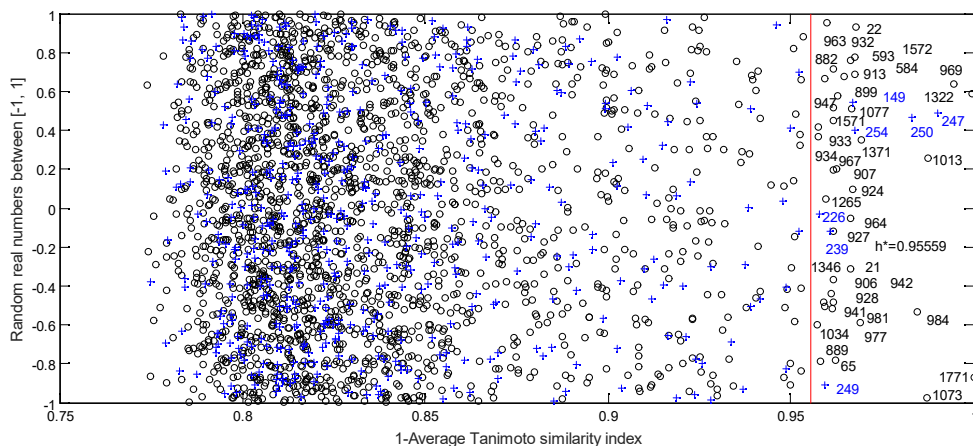

**Figure S20** Application domain (AD) plot of the KRFP consensus model.

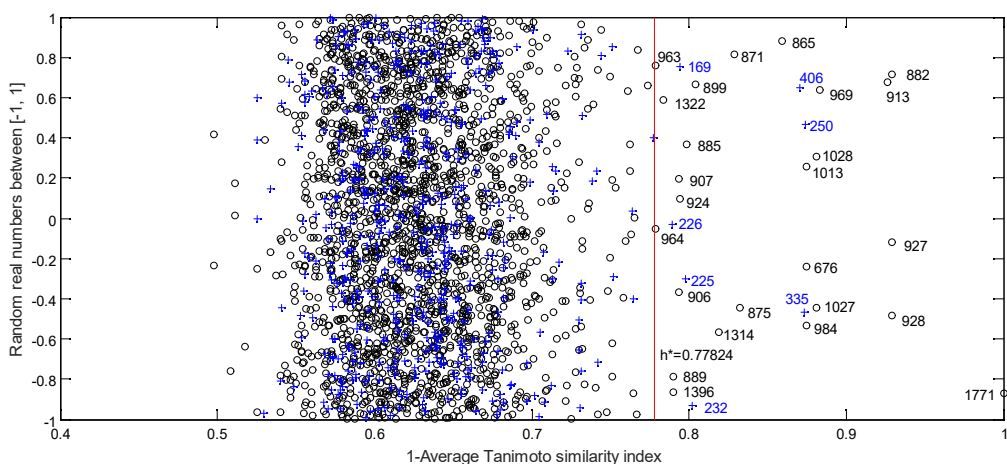

**Figure S21** Application domain (AD) plot of the SubFP consensus model.

**Table S1.** The parameters and performance of the 20 PubchemFP-Based classification model

| No. | Parameters |      | Performance  |      |      |      |                             |      |      |      |          |      |      |      |
|-----|------------|------|--------------|------|------|------|-----------------------------|------|------|------|----------|------|------|------|
|     |            |      | Training set |      |      |      | 5-fold cross validation set |      |      |      | Test set |      |      |      |
|     | C          | g    | ACC          | SE   | SP   | MCC  | ACC                         | SE   | SP   | MCC  | ACC      | SE   | SP   | MCC  |
| 1   | 6.53E+07   | 24.0 | 96.8         | 97.9 | 95.1 | 93.2 | 70.7                        | 73.2 | 66.3 | 38.8 | 76.5     | 79.2 | 71.9 | 50.5 |
| 2   | 1.36E+07   | 8.1  | 96.9         | 97.8 | 95.4 | 93.4 | 71.0                        | 77.3 | 60.2 | 37.6 | 77.5     | 81.6 | 70.4 | 51.9 |
| 3   | 7.71E+07   | 5.0  | 97.0         | 98.0 | 95.3 | 93.6 | 72.1                        | 81.5 | 56.2 | 38.8 | 77.8     | 84.0 | 67.3 | 52.0 |
| 4   | 2.42E+07   | 8.1  | 97.0         | 98.1 | 95.2 | 93.6 | 71.0                        | 77.6 | 59.8 | 37.5 | 75.9     | 80.4 | 68.4 | 48.6 |
| 5   | 5.65E+07   | 7.3  | 96.9         | 98.0 | 95.1 | 93.4 | 72.6                        | 78.6 | 62.5 | 41.2 | 75.9     | 81.0 | 67.3 | 48.4 |
| 6   | 6.06E+07   | 6.2  | 97.1         | 98.2 | 95.2 | 93.7 | 70.9                        | 79.3 | 56.7 | 36.6 | 75.2     | 81.3 | 64.8 | 46.5 |
| 7   | 7.15E+07   | 10.4 | 97.1         | 97.8 | 96.0 | 93.8 | 71.3                        | 76.7 | 62.0 | 38.5 | 76.5     | 80.1 | 70.4 | 50.1 |
| 8   | 8.23E+07   | 30.5 | 96.9         | 97.5 | 95.8 | 93.3 | 72.1                        | 75.0 | 67.2 | 41.5 | 74.8     | 77.7 | 69.9 | 47.0 |
| 9   | 7.36E+07   | 5.7  | 96.8         | 97.8 | 95.1 | 93.1 | 72.7                        | 80.6 | 59.3 | 40.6 | 76.9     | 83.4 | 65.8 | 49.9 |
| 10  | 6.37E+07   | 8.3  | 97.0         | 98.0 | 95.3 | 93.6 | 71.1                        | 76.7 | 61.4 | 38.0 | 76.9     | 80.7 | 70.4 | 50.8 |
| 11  | 4.47E+07   | 99.9 | 96.9         | 97.9 | 95.1 | 93.3 | 71.0                        | 72.7 | 68.0 | 39.8 | 74.8     | 77.7 | 69.9 | 47.0 |
| 12  | 5.32E+07   | 5.7  | 97.1         | 98.2 | 95.2 | 93.8 | 71.2                        | 79.3 | 57.2 | 37.2 | 75.4     | 81.0 | 65.8 | 47.0 |
| 13  | 5.09E+07   | 6.2  | 96.9         | 98.0 | 95.1 | 93.4 | 72.6                        | 79.8 | 60.3 | 40.6 | 77.1     | 83.4 | 66.3 | 50.4 |
| 14  | 5.49E+07   | 24.0 | 96.5         | 97.6 | 94.8 | 92.6 | 70.0                        | 73.5 | 64.0 | 36.9 | 75.4     | 79.5 | 68.4 | 47.6 |
| 15  | 8.05E+07   | 30.5 | 96.9         | 97.8 | 95.3 | 93.3 | 70.9                        | 73.5 | 66.6 | 39.2 | 75.0     | 78.6 | 68.9 | 47.0 |
| 16  | 5.37E+07   | 6.7  | 97.1         | 98.2 | 95.2 | 93.8 | 70.6                        | 77.7 | 58.5 | 36.5 | 75.4     | 80.7 | 66.3 | 47.1 |
| 17  | 7.23E+07   | 88.2 | 96.9         | 98.0 | 94.9 | 93.3 | 70.0                        | 73.3 | 64.5 | 37.1 | 76.1     | 78.3 | 72.4 | 50.0 |
| 18  | 2.28E+07   | 6.5  | 97.0         | 97.9 | 95.4 | 93.6 | 72.0                        | 78.9 | 60.2 | 39.5 | 75.9     | 80.4 | 68.4 | 48.6 |
| 19  | 7.80E+07   | 77.0 | 96.6         | 97.6 | 95.1 | 92.8 | 69.9                        | 72.3 | 65.8 | 37.3 | 75.6     | 78.6 | 70.4 | 48.4 |
| 20  | 9.64E+07   | 10.9 | 96.8         | 98.0 | 94.8 | 93.2 | 70.2                        | 73.8 | 64.1 | 37.3 | 77.3     | 81.0 | 70.9 | 51.6 |

**Table S2.** The parameters and performance of the 20 SubFP-Based classification model

| No. | Parameters |      | Performance(%) |      |      |      |                             |      |      |      |          |      |      |      |
|-----|------------|------|----------------|------|------|------|-----------------------------|------|------|------|----------|------|------|------|
|     |            |      | Training set   |      |      |      | 5-fold cross validation set |      |      |      | Test set |      |      |      |
|     | C          | g    | ACC            | SE   | SP   | MCC  | ACC                         | SE   | SP   | MCC  | ACC      | SE   | SP   | MCC  |
| 1   | 7.13E+07   | 17.0 | 91.6           | 94.6 | 86.6 | 81.9 | 67.9                        | 72.0 | 60.9 | 32.4 | 71.2     | 74.1 | 66.3 | 39.7 |
| 2   | 1.88E+07   | 46.4 | 86.2           | 88.3 | 82.6 | 70.6 | 67.1                        | 69.4 | 63.1 | 31.7 | 69.7     | 71.7 | 66.3 | 37.2 |

|    |          |      |      |      |      |      |      |      |      |      |      |      |      |      |
|----|----------|------|------|------|------|------|------|------|------|------|------|------|------|------|
| 3  | 4.66E+07 | 11.8 | 87.3 | 91.8 | 79.6 | 72.5 | 66.4 | 72.3 | 56.3 | 28.4 | 72.9 | 78.0 | 64.3 | 42.2 |
| 4  | 7.30E+07 | 6.2  | 89.3 | 94.1 | 81.1 | 76.9 | 67.0 | 73.3 | 56.2 | 29.4 | 72.9 | 77.4 | 65.3 | 42.4 |
| 5  | 8.00E+06 | 8.7  | 90.4 | 93.6 | 85.0 | 79.3 | 70.4 | 75.0 | 62.5 | 37.2 | 72.2 | 78.3 | 61.7 | 40.2 |
| 6  | 4.36E+07 | 20.5 | 90.5 | 94.4 | 83.9 | 79.5 | 69.5 | 73.9 | 61.9 | 35.4 | 73.7 | 78.0 | 66.3 | 44.0 |
| 7  | 2.37E+07 | 16.6 | 89.6 | 93.1 | 83.6 | 77.5 | 66.1 | 71.1 | 57.5 | 28.2 | 74.8 | 77.1 | 70.9 | 47.2 |
| 8  | 3.98E+07 | 65.7 | 85.1 | 90.5 | 76.1 | 67.7 | 65.9 | 70.1 | 58.8 | 28.4 | 69.5 | 75.0 | 60.2 | 35.0 |
| 9  | 5.74E+07 | 4.9  | 89.8 | 92.8 | 84.8 | 78.0 | 66.6 | 72.2 | 57.2 | 29.1 | 73.1 | 78.3 | 64.3 | 42.5 |
| 10 | 9.00E+05 | 18.5 | 88.2 | 94.3 | 77.8 | 74.3 | 66.6 | 71.8 | 57.7 | 29.2 | 70.6 | 76.2 | 61.2 | 37.3 |
| 11 | 3.55E+07 | 56.0 | 87.2 | 91.1 | 80.5 | 72.3 | 67.6 | 71.4 | 61.1 | 32.0 | 69.9 | 72.6 | 65.3 | 37.2 |
| 12 | 7.86E+07 | 32.2 | 88.4 | 92.8 | 80.8 | 74.8 | 66.6 | 72.4 | 56.8 | 29.0 | 71.4 | 77.4 | 61.2 | 38.7 |
| 13 | 6.19E+07 | 41.6 | 87.4 | 90.8 | 81.5 | 72.7 | 66.2 | 70.1 | 59.4 | 29.0 | 70.8 | 72.9 | 67.3 | 39.4 |
| 14 | 5.84E+07 | 20.9 | 90.0 | 93.0 | 84.8 | 78.3 | 70.0 | 73.5 | 64.0 | 36.8 | 71.6 | 75.9 | 64.3 | 39.8 |
| 15 | 1.12E+08 | 8.7  | 90.4 | 93.6 | 85.0 | 79.3 | 70.4 | 75.0 | 62.5 | 37.2 | 72.2 | 78.3 | 61.7 | 40.2 |
| 16 | 1.02E+08 | 8.7  | 88.7 | 92.4 | 82.4 | 75.6 | 69.8 | 75.4 | 60.2 | 35.5 | 70.8 | 75.6 | 62.8 | 38.1 |
| 17 | 1.01E+08 | 8.7  | 90.4 | 93.6 | 85.0 | 79.3 | 70.9 | 75.4 | 63.1 | 38.1 | 72.3 | 78.0 | 62.8 | 40.8 |
| 18 | 3.34E+07 | 58.1 | 86.4 | 87.9 | 83.9 | 71.2 | 65.7 | 70.2 | 58.1 | 27.9 | 71.0 | 70.8 | 71.4 | 41.0 |
| 19 | 9.56E+07 | 86.8 | 83.8 | 89.6 | 73.7 | 64.7 | 65.5 | 70.7 | 56.6 | 26.9 | 68.9 | 75.6 | 57.7 | 33.3 |
| 20 | 5.55E+07 | 56.0 | 85.7 | 89.6 | 78.9 | 69.1 | 65.8 | 70.0 | 58.6 | 28.2 | 71.2 | 74.4 | 65.8 | 39.6 |

**Table S3.** The parameters and performance of the 20 KRFP-Based classification model

| No. | Parameters |      | Performance(%) |      |      |      |                             |      |      |      |          |      |      |      |
|-----|------------|------|----------------|------|------|------|-----------------------------|------|------|------|----------|------|------|------|
|     |            |      | Training set   |      |      |      | 5-fold cross validation set |      |      |      | Test set |      |      |      |
|     | C          | g    | ACC            | SE   | SP   | MCC  | ACC                         | SE   | SP   | MCC  | ACC      | SE   | SP   | MCC  |
| 1   | 2.10E+06   | 5.0  | 96.2           | 97.8 | 93.5 | 91.8 | 71.8                        | 78.1 | 61.0 | 39.2 | 75.8     | 81.3 | 66.3 | 47.9 |
| 2   | 1.57E+07   | 5.8  | 96.4           | 97.5 | 94.7 | 92.4 | 71.3                        | 78.4 | 59.3 | 38.0 | 77.3     | 81.6 | 69.9 | 51.4 |
| 3   | 3.60E+06   | 5.2  | 96.9           | 98.2 | 94.5 | 93.3 | 70.8                        | 77.9 | 58.6 | 36.8 | 78.0     | 81.9 | 71.4 | 53.1 |
| 4   | 3.38E+07   | 17.0 | 96.7           | 97.6 | 95.2 | 92.9 | 69.9                        | 73.3 | 64.0 | 36.7 | 76.3     | 78.9 | 71.9 | 50.2 |
| 5   | 4.80E+06   | 16.6 | 96.6           | 97.8 | 94.7 | 92.8 | 70.7                        | 73.5 | 65.9 | 38.7 | 74.4     | 76.8 | 70.4 | 46.4 |
| 6   | 3.64E+07   | 32.6 | 96.9           | 98.0 | 94.9 | 93.3 | 69.7                        | 71.7 | 66.3 | 37.1 | 77.7     | 81.0 | 71.9 | 52.6 |
| 7   | 7.00E+06   | 30.5 | 96.8           | 97.9 | 94.9 | 93.2 | 68.7                        | 72.5 | 62.3 | 34.2 | 75.2     | 77.1 | 71.9 | 48.2 |
| 8   | 2.20E+06   | 6.9  | 96.5           | 97.9 | 94.1 | 92.6 | 69.8                        | 75.1 | 60.6 | 35.5 | 76.5     | 83.7 | 64.3 | 48.9 |
| 9   | 2.03E+07   | 15.4 | 96.8           | 97.9 | 94.8 | 93.1 | 70.9                        | 74.1 | 65.4 | 38.9 | 75.0     | 76.5 | 72.4 | 48.0 |
| 10  | 2.20E+06   | 6.9  | 96.5           | 97.9 | 94.3 | 92.6 | 69.6                        | 74.9 | 60.5 | 35.1 | 76.5     | 83.1 | 65.3 | 49.1 |
| 11  | 4.58E+07   | 7.1  | 96.6           | 98.0 | 94.3 | 92.8 | 71.0                        | 76.5 | 61.6 | 38.0 | 75.8     | 81.9 | 65.3 | 47.7 |
| 12  | 1.06E+07   | 6.5  | 96.5           | 97.6 | 94.5 | 92.5 | 68.8                        | 76.4 | 55.7 | 32.4 | 76.3     | 82.2 | 66.3 | 48.9 |
| 13  | 3.69E+07   | 6.3  | 96.1           | 97.5 | 93.8 | 91.6 | 68.9                        | 76.7 | 55.8 | 32.8 | 76.9     | 82.8 | 66.8 | 50.1 |
| 14  | 9.60E+06   | 5.8  | 96.7           | 98.1 | 94.4 | 93.0 | 68.2                        | 75.8 | 55.1 | 31.2 | 75.6     | 81.0 | 66.3 | 47.5 |
| 15  | 1.16E+07   | 7.1  | 96.6           | 98.0 | 94.1 | 92.7 | 70.9                        | 76.6 | 61.2 | 37.7 | 76.5     | 82.8 | 65.8 | 49.2 |
| 16  | 2.00E+06   | 11.1 | 96.4           | 97.6 | 94.3 | 92.2 | 69.6                        | 75.0 | 60.5 | 35.2 | 75.4     | 78.9 | 69.4 | 47.8 |
| 17  | 1.94E+07   | 4.6  | 96.9           | 97.9 | 95.3 | 93.4 | 70.3                        | 79.8 | 54.2 | 35.0 | 77.7     | 83.4 | 67.9 | 51.8 |
| 18  | 7.10E+06   | 9.2  | 96.8           | 97.9 | 95.1 | 93.2 | 67.6                        | 74.0 | 56.8 | 30.7 | 77.5     | 82.8 | 68.4 | 51.5 |
| 19  | 5.70E+06   | 7.4  | 96.7           | 97.9 | 94.8 | 93.0 | 68.7                        | 76.5 | 55.4 | 32.2 | 75.6     | 80.4 | 67.3 | 47.7 |
| 20  | 1.13E+07   | 14.7 | 96.6           | 97.8 | 94.5 | 92.7 | 68.4                        | 73.5 | 59.8 | 33.0 | 75.4     | 79.5 | 68.4 | 47.6 |

**Table S4.** The parameters and performance of the 20 E-stateFP-Based classification model

| No. | Parameters |      | Performance(%) |      |      |      |                             |      |      |      |          |      |      |      |
|-----|------------|------|----------------|------|------|------|-----------------------------|------|------|------|----------|------|------|------|
|     |            |      | Training set   |      |      |      | 5-fold cross validation set |      |      |      | Test set |      |      |      |
|     | 5.11E+07   | 45.5 | 79.2           | 87.3 | 65.3 | 54.4 | 65.1                        | 73.5 | 50.8 | 24.6 | 66.1     | 78.0 | 45.9 | 25.0 |
| 1   | 7.03E+07   | 45.5 | 80.0           | 86.8 | 68.4 | 56.4 | 64.9                        | 73.6 | 50.1 | 23.9 | 66.9     | 77.1 | 49.5 | 27.4 |
| 2   | 2.27E+07   | 15.1 | 79.7           | 88.7 | 64.4 | 55.4 | 66.3                        | 76.7 | 48.5 | 26.0 | 68.6     | 78.3 | 52.0 | 31.2 |
| 3   | 9.31E+07   | 34.0 | 82.3           | 88.2 | 72.2 | 61.4 | 61.6                        | 67.3 | 51.9 | 18.9 | 67.8     | 74.1 | 57.1 | 31.2 |
| 4   | 6.76E+07   | 35.7 | 82.1           | 87.8 | 72.3 | 61.1 | 65.8                        | 72.2 | 54.7 | 26.9 | 66.1     | 75.3 | 50.5 | 26.3 |
| 5   | 7.16E+07   | 15.6 | 82.3           | 88.8 | 71.3 | 61.5 | 63.3                        | 72.0 | 48.5 | 20.7 | 67.8     | 75.3 | 55.1 | 30.6 |
| 6   | 5.52E+07   | 47.9 | 77.2           | 85.1 | 63.7 | 50.2 | 64.6                        | 73.4 | 49.7 | 23.3 | 65.7     | 75.0 | 50.0 | 25.4 |
| 7   | 2.10E+06   | 14.1 | 82.4           | 87.3 | 73.9 | 61.8 | 63.2                        | 67.5 | 55.9 | 23.0 | 69.9     | 78.6 | 55.1 | 34.4 |
| 8   | 7.56E+07   | 6.9  | 84.1           | 90.8 | 72.7 | 65.4 | 64.5                        | 72.7 | 50.5 | 23.3 | 68.4     | 74.7 | 57.7 | 32.3 |
| 9   | 8.58E+07   | 6.9  | 83.5           | 91.2 | 70.2 | 63.9 | 64.9                        | 74.1 | 49.0 | 23.5 | 68.0     | 76.5 | 53.6 | 30.5 |
| 10  | 9.26E+07   | 35.8 | 80.2           | 87.4 | 68.0 | 56.9 | 64.2                        | 72.4 | 50.3 | 22.8 | 65.9     | 74.7 | 51.0 | 26.1 |
| 11  | 2.25E+07   | 9.8  | 76.9           | 82.5 | 67.4 | 50.1 | 62.3                        | 69.8 | 49.5 | 19.3 | 64.6     | 73.8 | 49.0 | 23.1 |
| 12  | 3.85E+07   | 12.2 | 84.3           | 88.7 | 76.9 | 66.1 | 64.6                        | 71.3 | 53.1 | 24.3 | 69.3     | 75.9 | 58.2 | 34.1 |
| 13  | 1.95E+07   | 15.1 | 81.3           | 88.5 | 68.9 | 59.0 | 65.0                        | 73.8 | 49.9 | 24.1 | 66.1     | 74.7 | 51.5 | 26.6 |
| 14  | 2.94E+07   | 5.3  | 82.8           | 88.5 | 73.1 | 62.6 | 63.7                        | 69.8 | 53.2 | 22.8 | 68.4     | 75.3 | 56.6 | 32.0 |
| 15  | 8.76E+07   | 38.7 | 78.3           | 82.8 | 70.7 | 53.5 | 64.0                        | 71.2 | 51.9 | 23.0 | 66.1     | 73.5 | 53.6 | 27.2 |
| 16  | 8.76E+07   | 38.5 | 79.8           | 85.4 | 70.1 | 56.2 | 64.4                        | 69.7 | 55.4 | 24.8 | 68.9     | 76.5 | 56.1 | 32.9 |
| 17  | 3.19E+07   | 8.7  | 79.0           | 88.0 | 63.6 | 53.8 | 65.6                        | 75.0 | 49.7 | 25.1 | 65.9     | 75.9 | 49.0 | 25.5 |
| 18  | 4.49E+07   | 50.0 | 77.1           | 84.9 | 63.7 | 49.9 | 64.9                        | 72.8 | 51.4 | 24.3 | 66.9     | 76.5 | 50.5 | 27.6 |
| 19  | 5.11E+07   | 45.5 | 79.2           | 87.3 | 65.3 | 54.4 | 65.1                        | 73.5 | 50.8 | 24.6 | 66.1     | 78.0 | 45.9 | 25.0 |
| 20  | 5.11E+07   | 45.5 | 79.2           | 87.3 | 65.3 | 54.4 | 65.1                        | 73.5 | 50.8 | 24.6 | 66.1     | 78.0 | 45.9 | 25.0 |

**Table S5.** Detailed information of privileged substructures responsible for DILI-positive compounds.

| NO. | Type      | Bit   | N <sub>negative</sub> | N <sub>positive</sub> | F <sub>DP</sub> | F <sub>DN</sub> | F <sub>DN</sub> /F <sub>DP</sub> |
|-----|-----------|-------|-----------------------|-----------------------|-----------------|-----------------|----------------------------------|
| 1   | SubFP     | 10    | 1                     | 12                    | 1.47            | 0.21            | 0.14                             |
| 2   |           | 62    | 0                     | 16                    | 1.59            | 0               | 0.00                             |
| 3   |           | 69    | 1                     | 15                    | 1.49            | 0.17            | 0.11                             |
| 4   |           | 197   | 1                     | 14                    | 1.48            | 0.18            | 0.12                             |
| 5   | PubchemFP | 329   | 1                     | 10                    | 1.44            | 0.25            | 0.17                             |
| 6   |           | 648   | 1                     | 11                    | 1.46            | 0.23            | 0.16                             |
| 7   |           | 40    | 1                     | 11                    | 1.46            | 0.23            | 0.16                             |
| 8   |           | 748   | 1                     | 11                    | 1.46            | 0.23            | 0.16                             |
| 9   | KRPF      | 1575  | 1                     | 12                    | 1.47            | 0.21            | 0.14                             |
| 10  |           | 1597  | 1                     | 14                    | 1.48            | 0.18            | 0.12                             |
| 11  |           | 1756  | 0                     | 10                    | 1.59            | 0               | 0.00                             |
| 12  |           | 1799* | 0                     | 14                    | 1.59            | 0               | 0.00                             |
| 13  |           | 3182* | 2                     | 22                    | 1.46            | 0.23            | 0.16                             |
| 14  |           | 3524  | 0                     | 10                    | 1.59            | 0               | 0.00                             |
| 15  |           | 3953* | 2                     | 18                    | 1.43            | 0.27            | 0.19                             |
| 16  |           | 4232* | 0                     | 10                    | 1.59            | 0               | 0.00                             |
| 17  |           | 4252* | 2                     | 26                    | 1.47            | 0.19            | 0.13                             |

|    |       |   |    |      |      |      |
|----|-------|---|----|------|------|------|
| 18 | 4387  | 0 | 11 | 1.59 | 0    | 0.00 |
| 19 | 4556  | 1 | 11 | 1.46 | 0.23 | 0.16 |
| 20 | 4651* | 1 | 15 | 1.49 | 0.17 | 0.11 |
| 21 | 4689* | 0 | 12 | 1.59 | 0    | 0    |
| 22 | 4692* | 0 | 11 | 1.59 | 0    | 0    |
| 23 | 4708  | 1 | 11 | 1.46 | 0.23 | 0.16 |
| 24 | 4778* | 1 | 13 | 1.47 | 0.19 | 0.13 |
| 25 | 4808* | 0 | 11 | 1.59 | 0    | 0    |

---
